# Supplementary material for: Sulodexide for Diabetic-Induced Disabilities: A Systematic Review and Meta-Analysis
Source: Springer Nature journal article supplement (doi:10.1007/s12325-021-01620-1), 2021-01-27

**Sulodexide for diabetic-induced disabilities: a systematic review and meta-analysis**

Online only additional material

**Table S1** Profile of the patients monitored in the studies on retinopathy

| **Ref. No.a** | **Study** | **Sulodexide arm** | | | | | | | **Control arm** | | | | |
| --- | --- | --- | --- | --- | --- | --- | --- | --- | --- | --- | --- | --- | --- |
| N/eyes | Diabetes type 1/2 | Mean duration (years) | Mean age (years) | Males, n (%) | Dose (LRU) | Observation period (months) | N/eyes | Diabetes type 1/2 | Mean duration (years) | Mean age (years) | Males, n (%) |
| **62** | Rubbi et al. 2000 | 30/NA | NA | NA | NA | NA | 600x1 im + 500x2 os | 4 | Non-comparative | | | | |
| **65** | Belcaro et al. 2019 | 38/NA | NA | NA | NA | NA | 250x2 os | 12 | 269/NA | NA | NA | NA | NA |
| **63** | Shadrichev 2009 | 86/129 | NA | NA | NA | NA | 600x1 im +500x1 os | 3 | 63/77 | NA | NA | NA |  |
| **64** | Song et al. 2015 | 59/82 | 0/59 | 15.4 | 59.1 | 29 (51) | 250x2 os | 12 | 57/83 | 0/57 | 14.2 | 59.9 | 19 (67) |
|  | **Total** | 213/211 | 0/59 | 15.4 | 59.1 | 29 |  |  | 389/160 | 0/57 | 14.2 | 59.9 | 19 |

aRefers to the reference number in the main paper

*im* intramuscular, *LRU* lipase-releasing unit, *NA* not applicable, *os* oral

**Table S2** Profile of the patients monitored in the studies on peripheral arterial disease and ulcers

| **Ref. No.a** | **Study** | **Sulodexide arm** | | | | | | | **Control arm** | | | | | |
| --- | --- | --- | --- | --- | --- | --- | --- | --- | --- | --- | --- | --- | --- | --- |
| N | Diabetes type 1/2 | Mean duration (years) | Mean age (years) | Males, n (%) | Dose (LRU) | Observation period | N | Diabetes type 1/2 | Mean duration (years) | Mean age (years) | Males, n (%) | Comparator |
|  | **PERIPHERAL ARTERIAL DISEASE** | | |  |  |  |  |  |  | | | | |  |
| **66** | Utratová et al. 1993 | 9 | NA | NA | 63.7 | NA | 600x1 im | 3 weeks | Non-comparative study | | | | | NA |
| **67** | Bregovsky et al. 1998 | 20 | NA | NA | NA | NA | 600x1 im + 250x2 os | 14 weeks | Non-comparative study | | | | | NA |
| **69** | Coccheri et al. 2002 | 36 | 0/36 | NA | 64.7 | NA | 600x1 im + 500x2 os | 27 weeks | 34 | 0/34 | NA | 66.2 | NA | Placebo |
| **70** | Moldovan et al. 2011 | 30 | 0/30 | NA | 60.0 | NA | 600x1 im + 250x2 os | 6 months | 30 | 0/30 | NA | 60.0 | NA | Placebo |
| **74** | Velussi et al. 1996b | 24 | 0/24 | NA | 67.0 | 16 (66.7) | 500x2 os | 6 months | 12 | 0/12 | NA | 64.0 | 9 (75.0) | SoC |
|  | **Total** | 119 | 0/90 | NA | 63.7 | NA |  |  | 76 | 0/76 | NA | 63.3 | NA |  |
|  | **ULCERS AND DIABETIC FOOT** | | |  |  |  |  |  |  |  |  |  |  |  |
| **68** | Koblik et al. 2001c | 12 | 2/10 | 16.2 | 62.6 | 8 (66.7) | 600x1 im + 500x2 os | 10 weeks | 6 | 2/4 | 13.3 | 57.5 | 3 (50.0) | Placebo |
| **71** | Katorkin 2015 | 31 | 0/31 | NA | 59.8 | 9 (29.0) | 600x1 im + 250x2 os | 7 weeks | 31 | 0/31 | NA | 59.1 | 10 (32.3) | SoC |
| **72** | Zakharova et al 2017 | 26 | 0/26 | NA | 69.8 | 8 (30.8) | 600x1 im + 250x2 os | 7 weeks | 26 | 0/26 | NA | 69.8 | 8 (30.8) | SoC |
|  | **Total** | 69 | 2/67 | NA | 63.7 | 25/69 |  |  | 63 | 2/61 | NA | 63.4 | 21/63 |  |

aRefers to reference number in the main paper

bListed also among the studies on renal complications; being the study a cross-over, sulodexide data were taken from the first period on sulodexide and from the second period on sulodexide; SoC data were taken only from the first period

cThe study was designed to examine patients with monolateral foot ulcer

*LRU* lipase-releasing unit, *NA* not applicable, *SoC* standard of care

**Table S3** Profile of the patients monitored in the studies on diabetic nephropathy

| **Ref No.a** | **Study** | **Sulodexide arm** | | | | | | | | | | **Control arm** | | | | | | | | | |
| --- | --- | --- | --- | --- | --- | --- | --- | --- | --- | --- | --- | --- | --- | --- | --- | --- | --- | --- | --- | --- | --- |
| N | Diabetes type 1/2 | Mean duration (years) | Mean age (years) | Males, n/N (%) | ACEI/ARB yes (%) | Micro/macro albuminuria | Dose | Obs period | Notes | N | Diabetes type 1/2 | | Mean duration (years) | Mean age (years) | | Males, n/N (%) | ACEI/ARB yes (%) | Micro/macro albuminuria | Notes |
| **73** | Solini et al. 1994 | 11 | 0/11 | NA | 52.3 | 6/11 | NA | 6/5 | 500x2 os | 8 wks |  | Non-comparative study | | | | | | | | | |
| 5 | 0/5 | NA | 45.0 | 1/5 | NA | 3/2 | 600x1 im | 3 wks |  | Non-comparative study | | | | | | | | | |
| **76** | Perušičová and Škrha 1997 | 35 | 20/15 | 15.9 | 48.2 | 18/35 | NA | NA | 600x1 im | 3 wks | 5 days/wk | Non-comparative study | | | | | | | | | |
| **77** | Poplawska et al. 1997 | 14 | 14/0 | 11.3 | 29.3 | 4/14 | NA | 7/7 | 600x1 im + 250x2 os | 31 dd |  | Non-comparative study | | | | | | | | | |
| **78** | Shestakova et al. 1997 | 18 | 18/0 | 15.0 | 28.9 | 6/18 | NA | 9/9 | 600x1 im | 3 wks | 5 days/wk | Non-comparative study | | | | | | | | | |
| **79** | Škrha et al. 1997 | 53 | 26/27 | 18.0 | 48.1 | 33/53 | 6/53 | 24/29 | 600x1 im | 3 wks | 5 days/wk | Non-comparative study | | | | | | | | | |
| **81** | Sorrenti et al. 1997 | 15 | 2/13 | 12.5 | 59.3 | 9/15 | 7/15 | 13/2 | 600x1 im | 4 wks |  | Non-comparative study | | | | | | | | | |
| **82** | Szelachowska et al. 1997 | 15 | 15/0 | NA | 38.8 | 7/15 | NA | NA | 600x1 im | 3 wks |  | Non-comparative study | | | | | | | | | |
| **83** | Rasovskiĭ et al. 1998 | 20 | 20/0 | 9.3 | 40.8 | 7/20 | NA | 20/0 | 600x1 im | 3 wks | 5 days/wk | Non-comparative study | | | | | | | | | |
| **85** | Zalevskaia et al. 1998 | 20 | 3/17 | 18.8 | 36.6 | 5/20 | NA | 14/6 | 600x1 im | 3 wks | 5 days/wk | Non-comparative study | | | | | | | | | |
| **86** | Oksa et al. 1999 | 20 | 12/8 | 15.5 | 45.0 | 12/20 | NA | 12/8 | 600x1 im | 3 wks |  | Non-comparative study | | | | | | | | | |
| 19 | 11/8 | 17.0 | 46.0 | 12/19 | NA | NA | 500x2 os | 8 wks |  | Non-comparative study | | | | | | | | | |
| **45** | Peterkova et al. 1999 | 17 | 17/0 | 11.0 | 15.0 | 10/17 | NA | 11/6 | 600x1 im + 250x2 os | 4 wks |  | Non-comparative study | | | | | | | | | |
| **87** | Sun et al. 1999 | 36 | 0/36 | 11.9 | 57.9 | 25/36 | NA | NA | 600x1 im | 3 wks | 5 days/wk | Non-comparative study | | | | | | | | | |
| **88** | Lichiardopol et al. 2001 | 31 | 21/10 | NA | 54.4 | 21/31 | NA | 17/14 | 600x1 im | 3 wks |  | Non-comparative study | | | | | | | | | |
| **93** | Blouza et al. 2010 | 216 | 24/191 | 11.0 | 55.4 | 118/216 | NA | 144/42 | 250x2 os | 6 mo |  | Non-comparative study | | | | | | | | | |
| **105** | Li et al. 2017b | 20 | 0/20 | NA | NA | NA | NA | NA | 500x2 os | 3 mo |  | Non-comparative study | | | | | | | | | |
| 20 | 0/20 | NA | NA | NA | NA | NA | 1200x1 iv + 500x2 os | 3 mo |  | Non-comparative study | | | | | | | | | |
| **74** | Velussi et al. 1996b,c | 24 | 0/24 | NA | 67.0 | 16/24 | NA | 24/0 | 500x2 os | 6 mo |  | 12 | | 0/12 | NA | 68.0 | 9/12 | | NA | 12/0 | Placebo |
| **75** | Dedov et al. 1997 | 18 | 18/0 | NA | 28.9 | 6/18 | NA | 9/9 | 600x1 im | 3 wks | 5 days/wk | 18 | | 18/0 | NA | 34.4 | 9/18 | | NA | 9/9 | Placebo |
| **80** | Solini et al. 1997c | 12 | 0/12 | 7.3 | 52.0 | NA | 2/12 | NA | 500x2 os | 4 mo |  | 6 | | 0/6 | 7.3 | 52.0 | NA | | NA | NA | Placebo |
| **89** | Gambaro et al. 2002 | 56 | 30/26 | 16.0 | 49.0 | 32/56 | 27/56 | 40/16 | 250x2 os | 4 mo |  | 56 | | 30/26 | 17.2 | 47.0 | 33/56 | | 30/56 | 30/26 | Placebo |
| 56 | 33/23 | 15.8 | 47.4 | 41/56 | 27/56 | 39/17 | 500x2 os | 4 mo |  |
| 55 | 31/24 | 16.2 | 46.9 | 40/55 | 32/55 | 27/28 | 1000x2 os | 4 mo |  |
| **90** | Achour et al. 2005 | 30 | 15/15 | 14.0 | 48.0 | 16/30 | NA | 15/15 | 250x2 os | 12 mo |  | 30 | | 15/15 | 14.0 | 48.0 | 16/30 | | NA | 15/15 | Untreated |
| **91** | Sulikowska et al. 2006 | 30 | 30/0 | 17.8 | 34.6 | 23/30 | 11/30 | NA | 500x2 os | 4 mo |  | 13 | | 13/0 | 18.0 | 36.8 | 10/13 | | 4/13 | NA | Untreated |
| **92** | Heerspink et al. 2008 | 50 | 0/50 | NA | 64.1 | 36/50 | 50/50 | 50/0 | 1000x2 os | 6 mo |  | 47 | | 0/47 | NA | 60.3 | 33/47 | | 47/47 | 47/0 | Placebo |
| 52 | 0/52 | NA | 61.1 | 38/52 | 52/52 | 52/0 | 2000x2 os | 6 mo |  |
| **94** | Mao and Zhong 2010 | 30 | 0/30 | 9.0 | 59.0 | 20/30 | 30/30 | NA | 600x1 im + 250x2 os | 6 mo | + Benazepril 10 mg/day | 30 | | 0/30 | 11.0 | 61.0 | 19/30 | | 30/30 | NA | Benazepril |
| **95** | Ren et al. 2010 | 23 | 0/23 | NA | 55.2 | NA | 14/23 | 23/0 | 600x1 iv + 1000x2 os | 4 wks |  | 18 | | 0/18 | NA | 55.2 | NA | | 10/18 | 18/0 | Untreated |
| **96** | Wang 2010 | 13 | 0/13 | NA | NA | NA | NA | NA | 500x2 os | 4 wks |  | 13 | | 0/13 | NA | NA | NA | | NA | NA | Untreated |
| **97** | Lewis et al. 2011 | 524 | 0/524 | NA | 62.0 | 394/524 | 524/524 | 524/0 | 1000x2 os | 26 wks |  | 532 | | 0/532 | NA | 62.3 | 408/532 | | 532/532 | 532/0 | Placebo |
| **98** | He and Ge 2012 | 33 | NA | NA | 42.0 | 19/33 | NA | 33/0 | 600x1 im + 250x2 os | 8 wks |  | 33 | | NA | NA | 42.0 | 19/33 | | NA | 33/0 | Untreated |
| **99** | Packham et al. 2012d | 619 | 0/619 | NA | 62.3 | 383/619 | 432/619 | 0/619 | 1000x2 os | up to 24 mo |  | 623 | | 0/623 | NA | 63.6 | 370/623 | | 457/623 | NA | Placebo |
| **100** | Kang 2013 | 33 | 0/33 | NA | 57.6 | NA | NA | 33/0 | 600x1 im + 250x2 os | 8 wks |  | 29 | | 0/29 | NA | 57.6 | NA | | NA | 29/0 | Untreated |
|  | 31 | | 0/31 | NA | 57.6 | NA | | NA | 33/0 | Fosenopril |
| **101** | Xiong 2014 | 35 | 0/35 | 7.7 | 50.0 | 21/35 | 35/35 | 35/0 | 600x1 iv + 1000x2 os | 8 wks | + Losartan 50 mg/day | 30 | | 0/30 | 7.5 | 51.7 | 18/30 | | 30/30 | 30/0 | Losartan |
| **102** | Satirapoj et al. 2015 | 20 | 0/20 | 9.4 | 62.9 | 13/20 | 15/20 | NA | 500x2 os | 14 wks | Normo-albuminuric | 20 | | 0/20 | 6.2 | 63.7 | 12/20 | | 14/20 | NA | Placebo; normo-albuminuric |
| **104** | Dakhli et al. 2016 | 53 | 3/49 | 12.0 | 52.2 | 38/53 | NA | 37/8 | 250x2 os | 6 mo |  | 42 | | 2/40 | 14.8 | 52.5 | 26/42 | | 42/42 | 26/16 | Captopril |
| 28 | 6/22 | 16.4 | 50.3 | 19/28 | 28/28 | 8/18 | 250x2 os | 6 mo | + Captopril 25 mgx2/day |
|  | **Total** | 2378 | 369/1975 | 13.3 | 56.3 | 1449/ 2258 (64.2) | 1292/1658 (78.0) | 1229/860 |  |  |  | 1583 | | 78/1472 | 13 | 60.3 | 982/ 1486 (66.0) | | 1196/1411 (84.8%) | 814/695 |  |

aRefers to reference number in the main paper

bListed also among the studies on vascular complications

cBeing the study a cross-over, sulodexide data were taken from the first and second period; control data were taken only from the first period due to an evident carry-over effect.

dFinal data available only for 144 treated and 142 controls

*ACEI* angiotensin-converting enzyme inhibitor, *ARB* angiotensin receptor II blocker, *im* intramuscular, *mo* months, *NA* not applicable, *Obs* observation, *os* oral, *wks* weeks

**Table S4** Risk of bias in each of the comparative study

| **Outcome** | **Reference** | **Randomization process** | **Deviations from intended interventions** | **Missing outcome data** | **Measurement of the outcome** | **Selection of the reported result** | **Overall Bias** |
| --- | --- | --- | --- | --- | --- | --- | --- |
| **Ocular** | Shadrichev 2009 | High | Low | Low | Low | Some concern | High |
| Song et al. 2015 | Low | Low | Low | Low | Low | Low |
| Belcaro et al. 2019 | High | High | High | High | Some concern | High |
| **Renal** | Dedov et al. 1997 | Low | Low | Low | Low | Some concern | Some concern |
| Solini et al. 1997 | Low | Low | Low | Low | Low | Low |
| Gambaro et al. 2002 | Low | Low | Low | Low | Low | Low |
| Achour et al. 2005 | High | Low | Low | Some concern | Some concern | High |
| Sulikowska et al. 2006 | Some concern | Low | Low | Low | Some concern | Some concern |
| Heerspink et al. 2008 | Low | Low | Some concern | Low | Low | Some concern |
| Mao and Zhong 2010 | High | Low | Low | Low | Some concern | High |
| Ren et al. 2010 | High | Low | Low | Low | Some concern | High |
| Wang 2010 | Some concern | Low | Low | Low | Some concern | Some concern |
| Lewis et al. 2011 | Low | Low | Some concern | Low | Low | Some concern |
| He and Ge 2012 | Low | Low | Low | Low | Some concern | Some concern |
| Packham et al. 2012 | Low | Low | High | Low | Low | High |
| Kang 2013 | High | Low | Low | Low | Some concern | High |
| Xiong 2014 | Some concern | Low | Low | Some concern | Some concern | Some concern |
| Satirapoj et al. 2015 | Low | Low | Low | Low | Low | Low |
| Dakhli et al. 2016 | High | Low | Low | Low | Some concern | High |
| **Vascular** | Velussi et al. 1996a | Low | Low | Low | Low | Some concern | Some concern |
| Koblik et al. 2001 | Low | Low | Low | Low | Low | Low |
| Coccheri et al. 2002 | Low | Low | Low | Low | Low | Low |
| Moldovan et al. 2011 | Low | Low | Low | Low | Some concern | Some concern |
| Katorkin 2015 | Some concern | Low | Low | Low | Some concern | Some concern |
| Zakharova et al 2017 | High | Low | Low | Low | Some concern | High |

aStudy reporting renal and vascular outcomes

**Table S5** Number of patients with adverse events specifically indicated in the studies

| **Ref. No.a** | **Study** | **Sulodexide** | | **Controls** | | **Notes** |
| --- | --- | --- | --- | --- | --- | --- |
| Patients with AEs | Patients monitored | Patients with AEs | Patients monitored |
| **73** | Solini et al. 1994 | 0 | 16 | – | |  |
| **74** | Velussi et al. 1996 | 0 | 24 | – | |  |
| **75** | Dedov et al. 1997 | 0 | 18 | 0 | 18 |  |
| **76** | Perušičová and Škrha 1997 | 0 | 35 | – | |  |
| **79** | Škrha et al. 1997 | 0 | 53 | – | |  |
| **80** | Solini et al. 1997 | 0 | 12 | 0 | 12 |  |
| **81** | Sorrenti et al. 1997 | 0 | 15 | – | |  |
| **82** | Szelachowska et al. 1997 | 0 | 15 | – | |  |
| **89** | Gambaro et al. 2002 | 11 | 167 | 5 | 56 | Number of events |
| **90** | Achour et al. 2005 | 0 | 30 | 0 | 30 |  |
| **92** | Heerspink et al. 2008 | 20 | 102 | 4 | 47 | Number of patients with serious AEs |
| **93** | Blouza et al. 2010 | 13 | 237 | – | |  |
| **97** | Lewis et al. 2011 | 57 | 524 | 65 | 532 | Number of patients with serious AEs |
| **70** | Moldovan et al. 2011 | 5 | 30 | 4 | 30 |  |
| **102** | Satirapoj et al. 2015 | 1 | 20 | 2 | 20 |  |
| **64** | Song et al. 2015 | 7 | 63 | 11 | 64 |  |
| **104** | Dakhli et al. 2016 | 14 | 81 | 9 | 42 |  |

aRefers to reference number in the main paper

*AE* adverse event


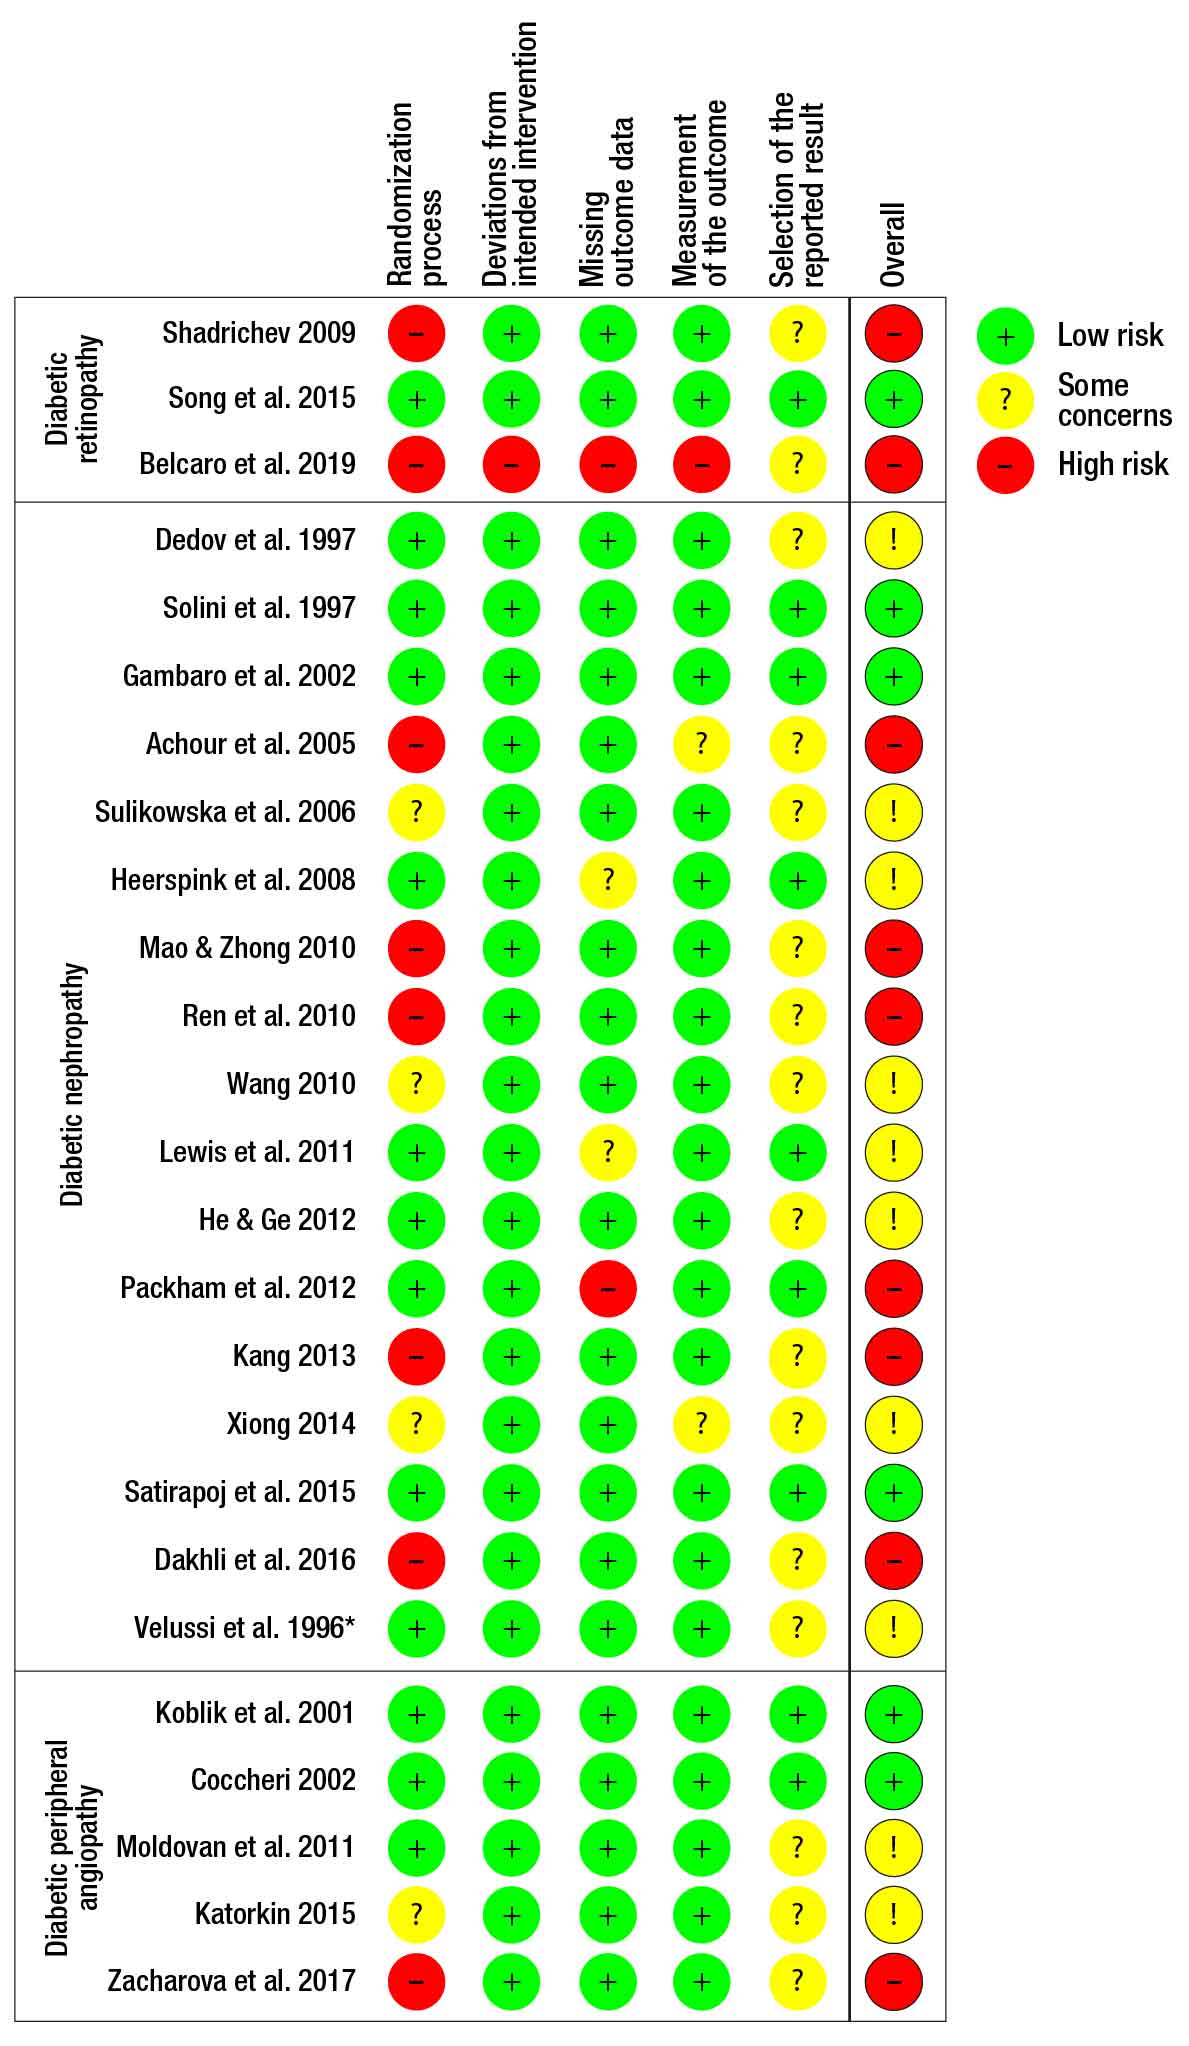
**Fig. S1** Assessment of the risk of bias for each study considered in the quantitative synthesis. The asterisk denotes a study included in both, nephropathy and vasculopathy evaluations

**Fig. S2** Forest plot of comparison between sulodexide versus controls in diabetes-associated ulcers, including the study in patients with diabetic foot (Koblik 2001). Outcome = mean gain in time to healing


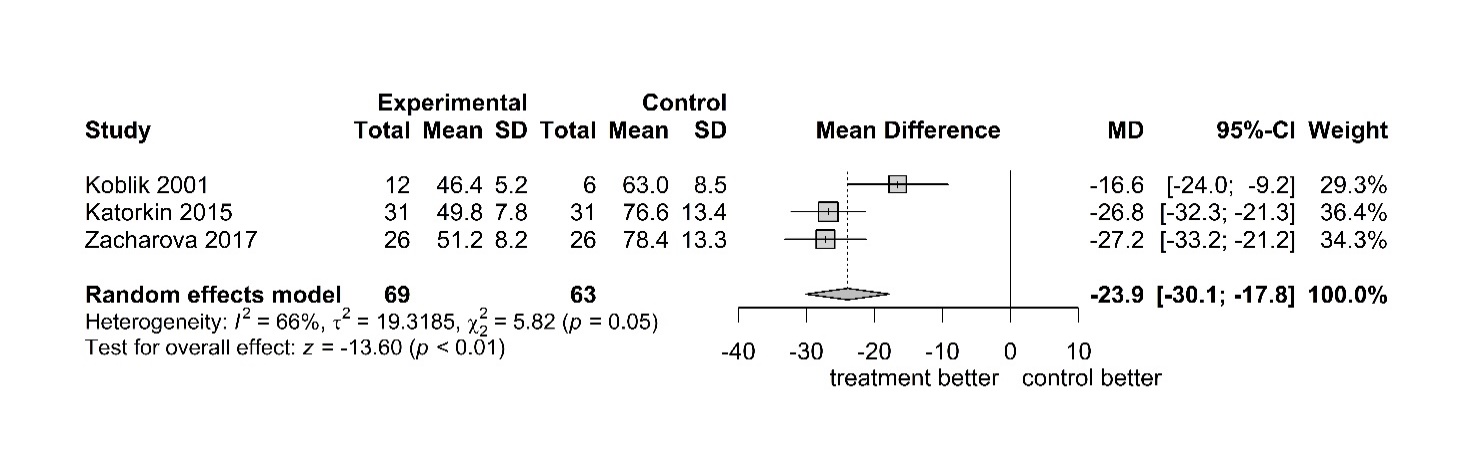


**Fig. S3** Forest plot of comparison between sulodexide versus controls in diabetes-associated ulcers, including the study in patients with diabetic foot (Koblik 2001). Outcome = healing proportion after 2 months of treatment (2.5 months in the Koblik 2001 study)


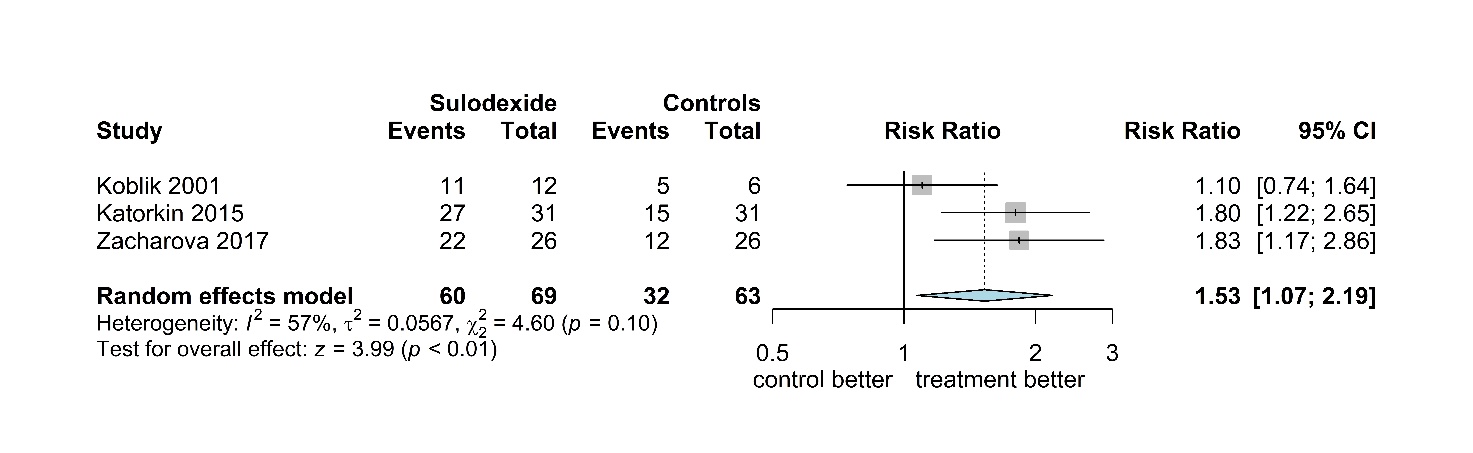


**Fig. S4** Forest plot of comparison between sulodexide versus controls in diabetes-associated and non-diabetes-associated ulcers. Outcome = healing proportion after 2–2.5 months of treatment, compared among diabetics and general patients using the random effects model


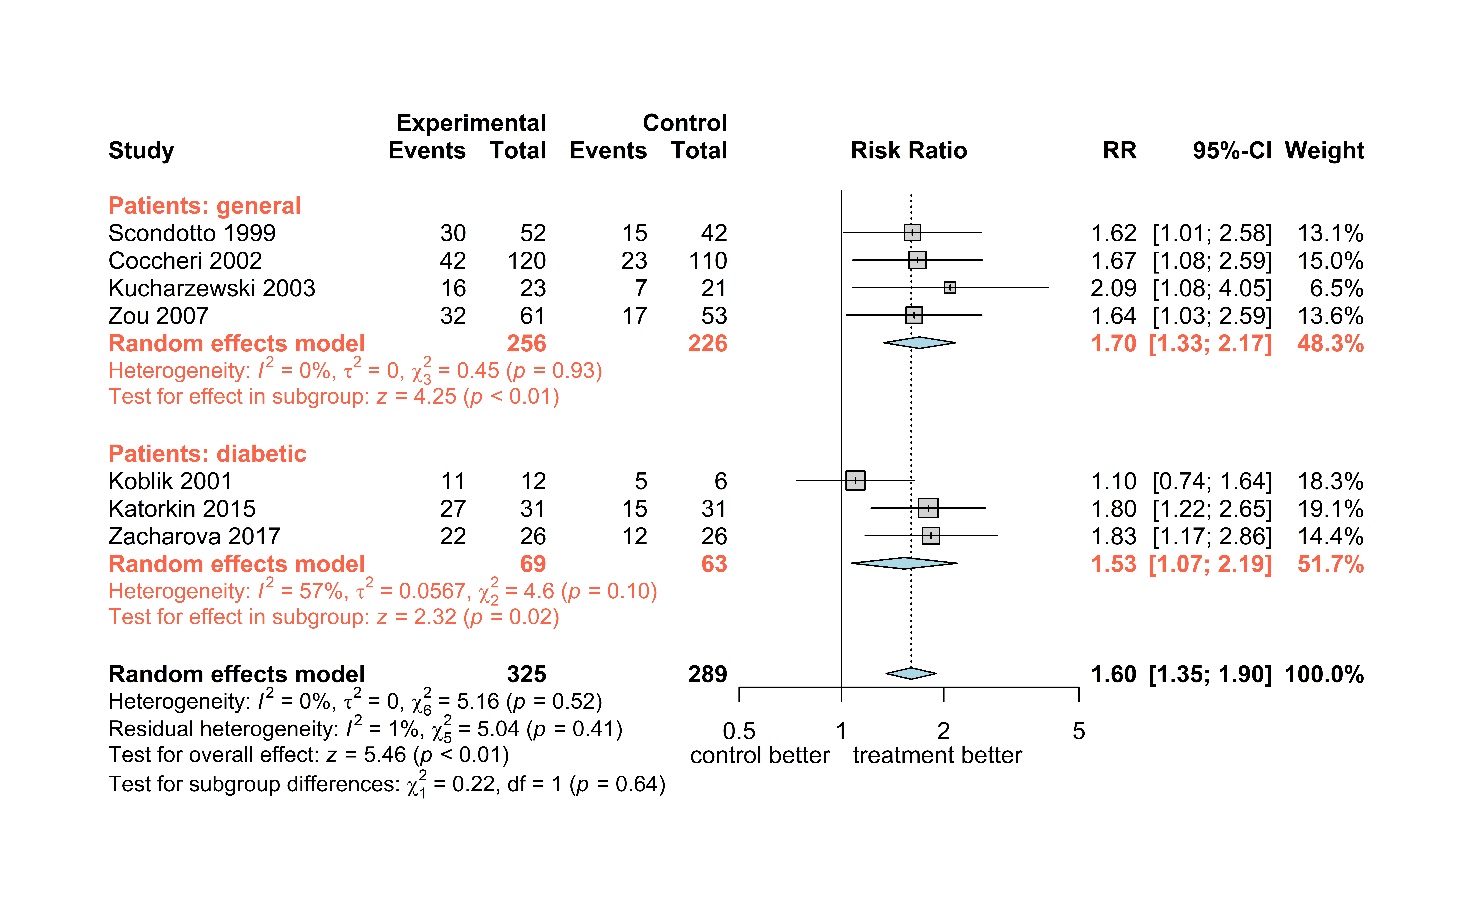


**Fig. S5** Forest plot of comparison between sulodexide versus controls in diabetes-associated and non-diabetes-associated ulcers. Outcome = healing proportion in 2–2.5 months of treatment, compared among diabetics and general patients using the random effects model with exclusion of the study in patients with diabetic foot


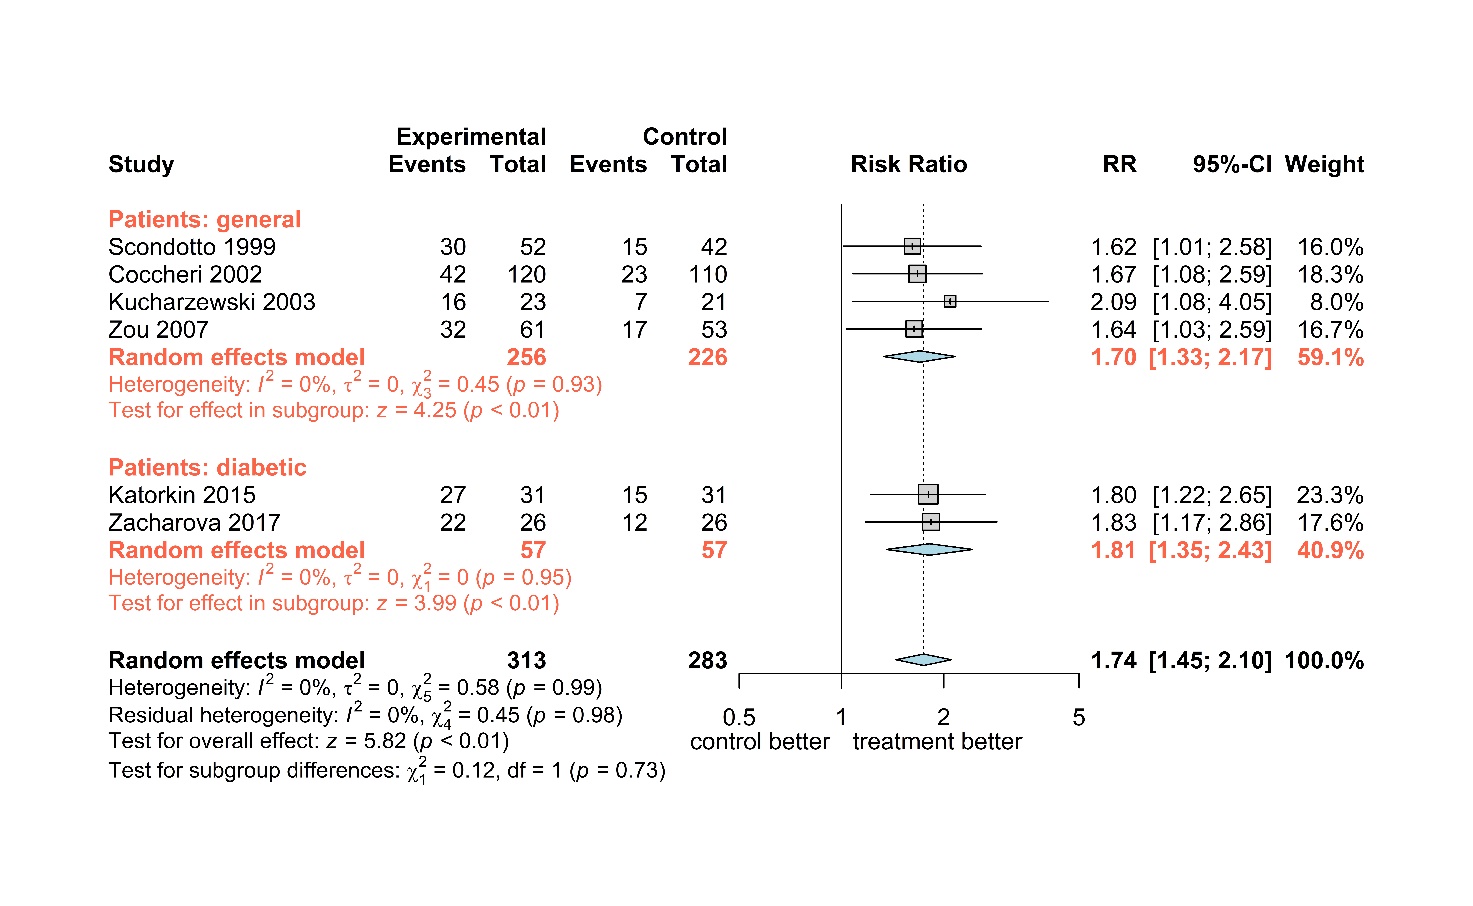

Supplement: MOESM1 [file 18804390]
